# Supplementary material for: Brain clearance is reduced during sleep and anesthesia
Source: PubMed Central journal article supplement (PMC11156584; doi:10.1038/s41593-024-01638-y), 2024-05-13

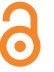

---

# Brain clearance is reduced during sleep and anesthesia

---

In the format provided by the authors and unedited

---

**Supplementary Data Fig. 1. Linear relationships existed between fluorescent intensity and concentration.** The fluorescent intensity recorded using the optical fiber was linearly related to the concentration of **a**, AF488 ( $n = 5$  independent experiments) and **b**, 4k-FITC-dextran ( $n = 5$  independent experiments) in solution. This calibration was made using the same solution used to prepare the brain phantoms gels (see Methods). Linearity was also observed with imaged brain slices that had been incubated with varying concentrations of either **c**, AF488 ( $n = 8$  independent experiments) or **d**, 4k-FITC-dextran ( $n = 6$  independent experiments). Where error bars (SEM) are not shown they were smaller than the size of the symbol.

**a**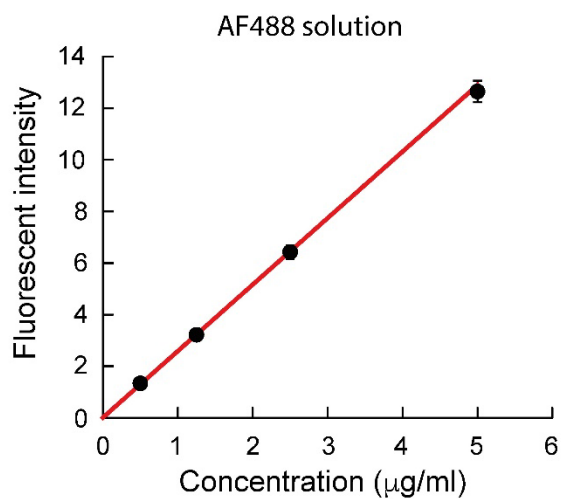**b**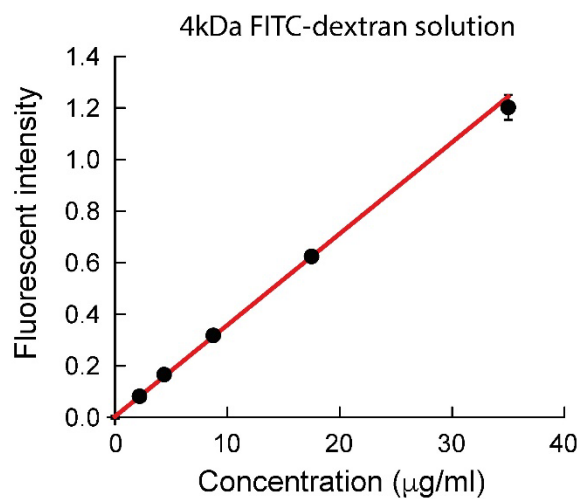**c**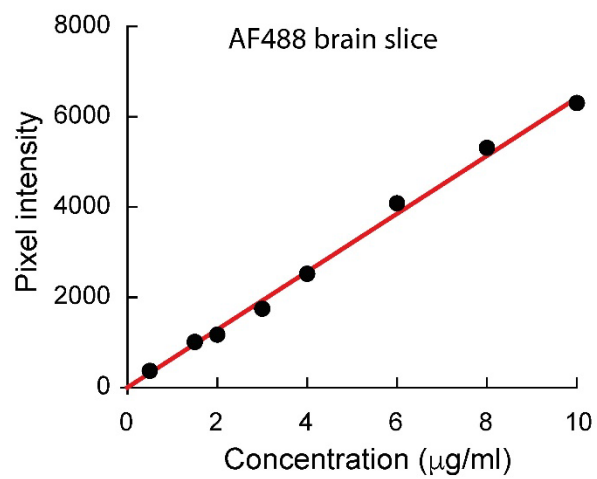**d**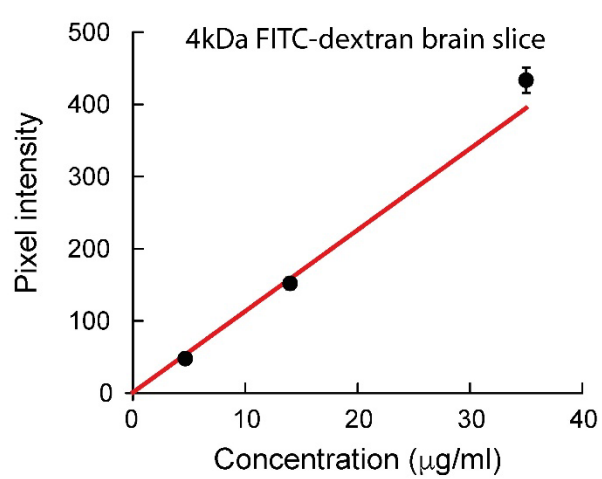

Supplement: 41593_2024_1638_MOESM1_ESM.pdf [file 41593_2024_1638_MOESM1_ESM.pdf]
